# Supplementary material for: Drug–matrix interaction of sodium diclofenac incorporated into ureasil–poly(ethylene oxide) hybrid materials
Source: Royal Society of Chemistry journal article supplement (doi:10.1039/c2ra01216b), 2012-01-01
Supplement: c2ra01216b.pdf [file c2ra01216b.pdf]

## SUPPLEMENTARY MATERIAL

Fig. S1: Curve fitting of the Raman bands around  $1600\text{ cm}^{-1}$ : sodium diclofenac (a), SDCF loaded PEO500 (b) and PEO1900 (c).

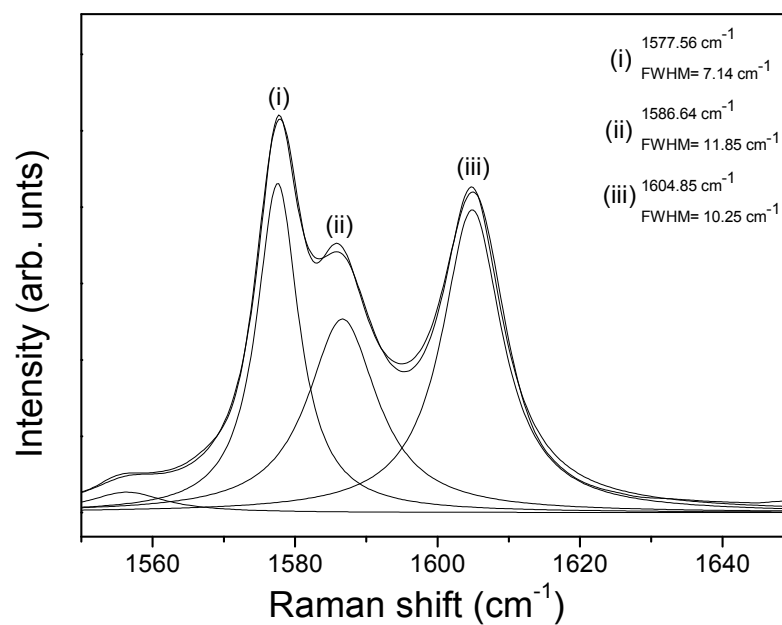

FIGURE S1(a)

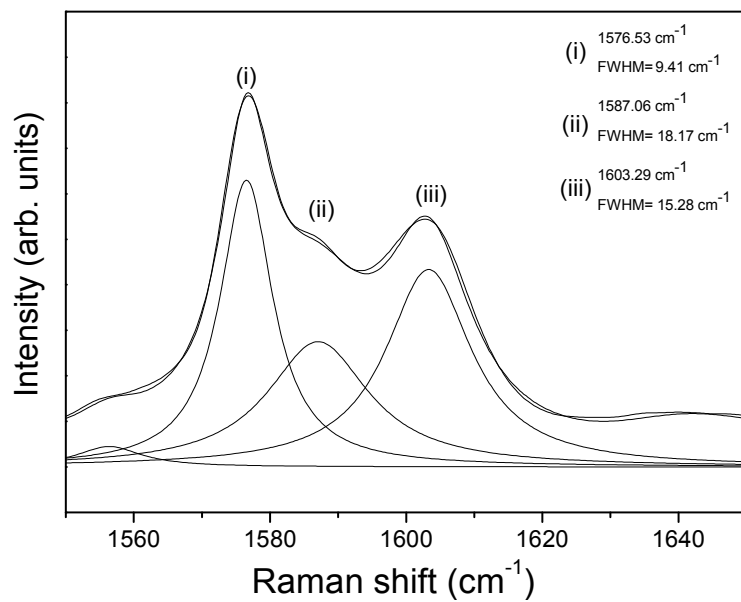

FIGURE S1(b)

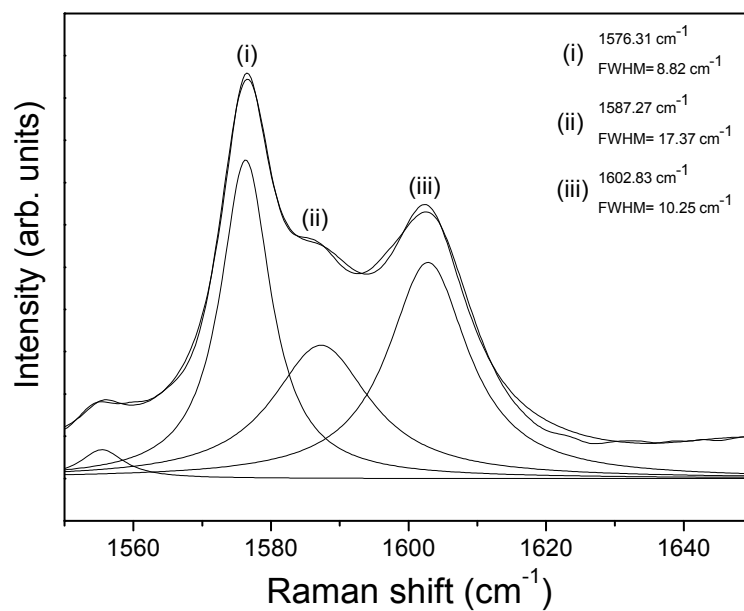

FIGURE S1(c)
